# Supplementary material
Source: PubMed Central journal article supplement (PMC8478080)
Supplement: NIHMS1649054-supplement-2.pdf [file NIHMS1649054-supplement-2.pdf]

## Supplemental Information

### Molecular Features of Cancers Exhibiting Exceptional Responses to Treatment

David A. Wheeler, Naoko Takebe, Toshinori Hinoue, Alina M. Hamilton, Maria F. Cardenas, Peter W. Laird, Katherine A. Hoadley, Linghua Wang, Adrienne Johnson MS, Ninad Dewal, Vincent Miller,<sup>7</sup> David Piñeyro,<sup>8,10</sup> Manuel Castro de Moura, Manel Esteller, Hui Shen, Jean Claude Zenklusen, Roy Tarnuzer, Lisa M. McShane, James V. Tricoli, Paul M. Williams, Irina Lubensky, Geraldine O'Sullivan-Coyne, Elise C. Kohn, Richard Little, Jeffrey White, Shakun Malik, Lyndsay Harris, Carol Weil, Alice P. Chen, Chris Karlovich, Brian Rodgers, Lalitha Shankar, Paula Jacobs, Tracy Nolan, Donna M. Muzny, Harshavardnan Doddapaneni, Viktoriya Korchina, Julie Gastier-Foster, Jay Bowen, Kristen Leraas, Elijah F. Edmondson, James H. Doroshow, Barbara A. Conley, S. Percy Ivy, Louis M. Staudt.

Figure S1

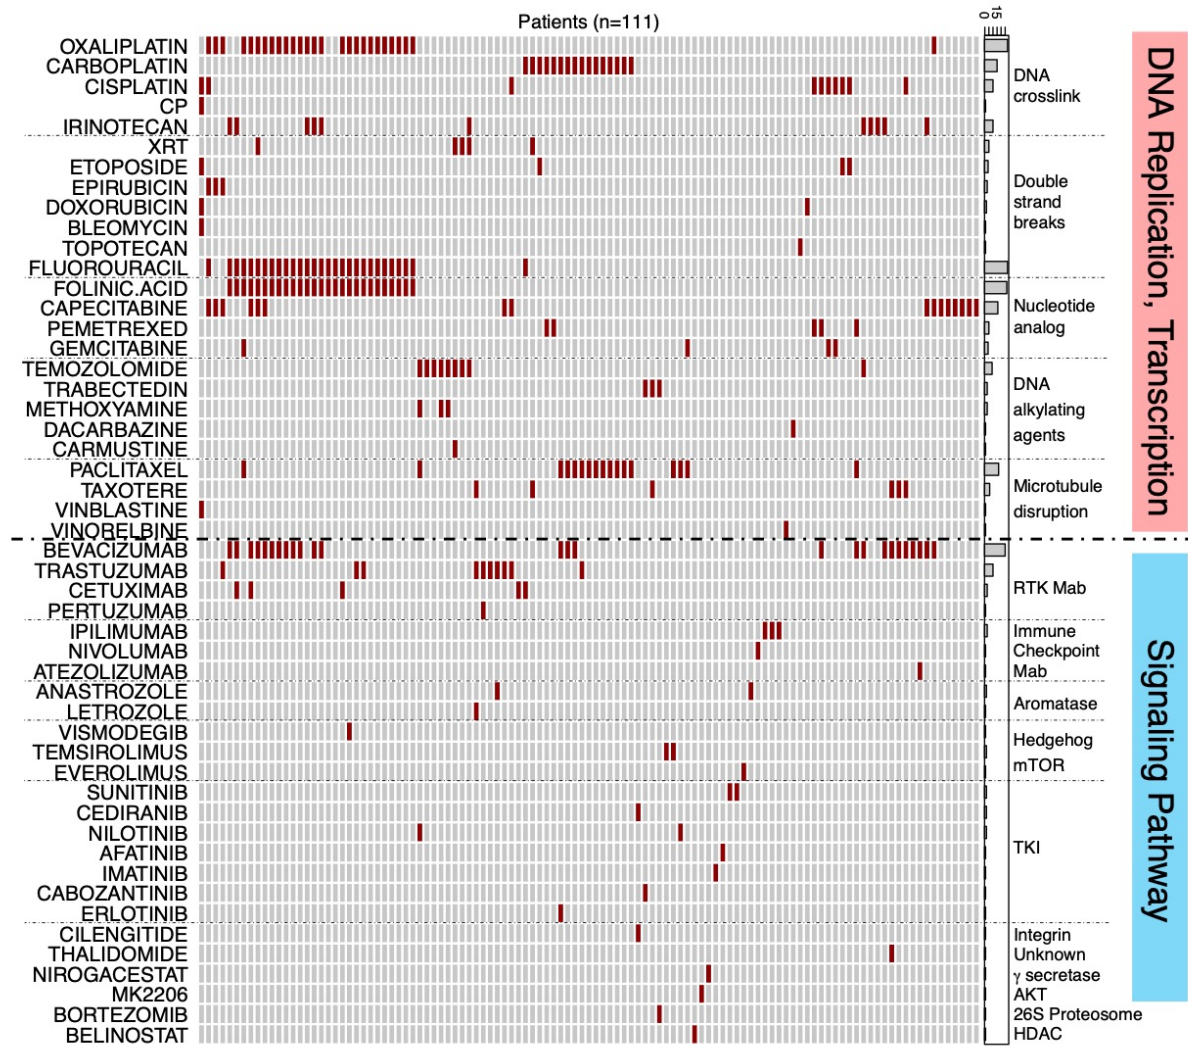

**Figure S1. Agents used in treatments leading to exceptional response, Related to STAR**

**Methods.** Treatment agents are listed on the left and categorized by mechanism of action as indicated on the right. Treatments involving standard combinations of drugs are evident from systematic correlation across multiple patients. FOLFOX, 5-FU, Folinic acid, oxaliplatin; FOLFIRI, 5-FU, Folinic acid, Irinotecan; FOLFIRINOX, 5-FU, Folinic acid, Irinotecan, Oxaliplatin; EOX, Epirubicin, Oxaliplatin, Capecitabine (Xeloda). Some agents could be classified in more than one category, for example Carmustine alkylates N1 of guanine and N3 of cytosine but also forms inter-strand crosslinks. Note, methoxyamine (TRC102) binds to apurinic/aprimidinic sites formed in the first step of base excision repair, thereby blocking this repair pathway, leading to double stranded breaks. Further, bound methoxyamine poisons topoisomerase 2, preventing it from re-joining double strand breaks during replication and transcription. It is classified with the alkylating agents because it is often given in combination with alkylating agents. Carmustine is administered infused in a biodegradable, Gliadel, wafer layered onto the site from which the brain tumor was resected. CP, cyclophosphamide; XRT, X-ray treatment. The mechanism of action of Thalidomide is unknown.

Figure S2

A

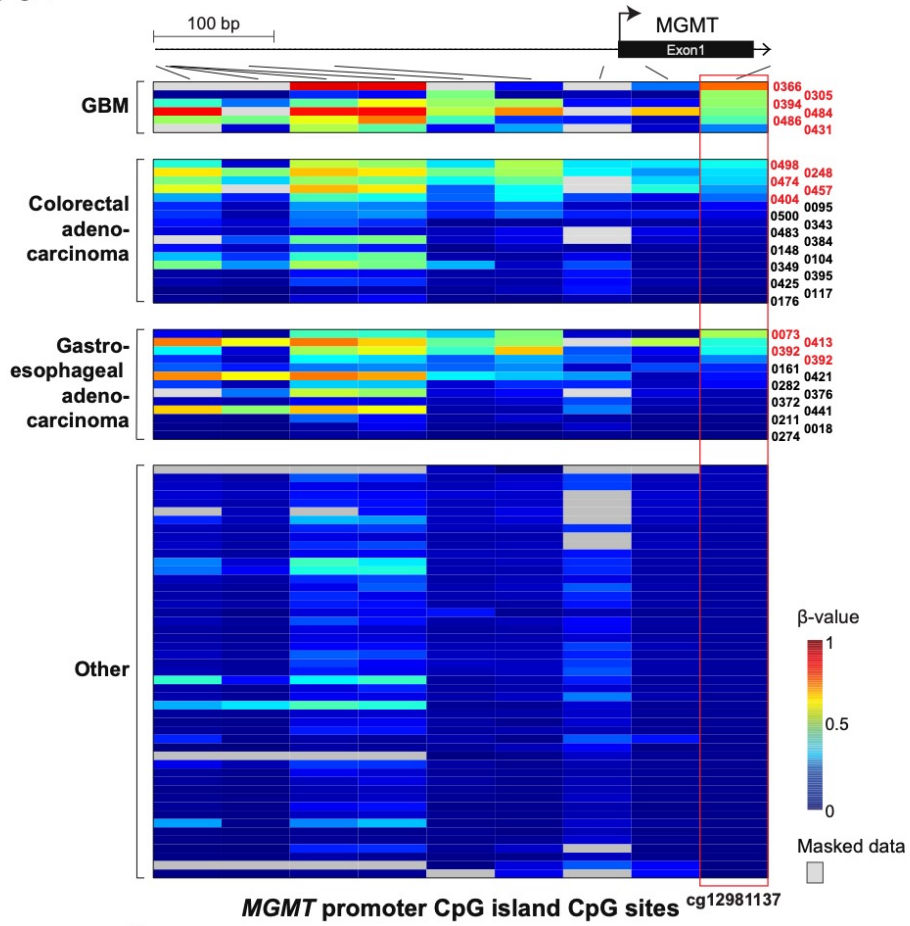

B

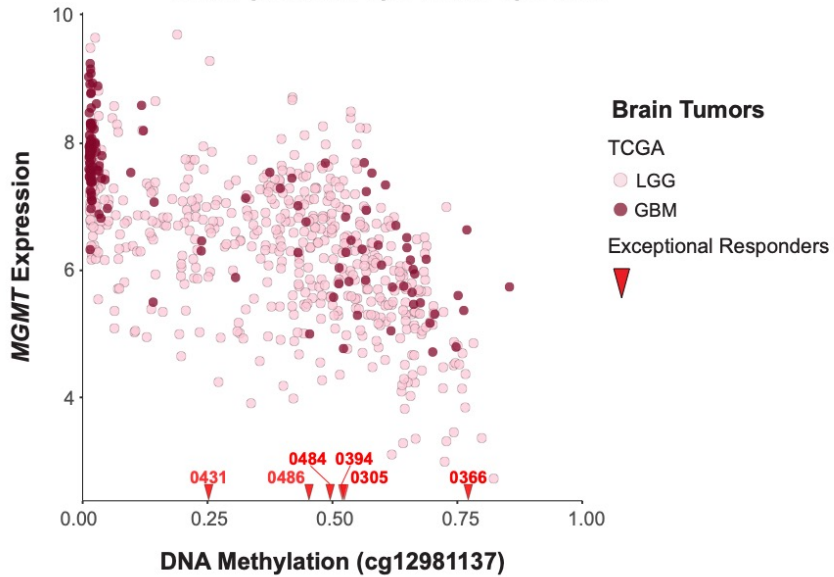

**Figure S2. *MGMT* CpG island promoter DNA hypermethylation analysis, Related to Figure 1D.**

**(A)** DNA methylation patterns at the *MGMT* promoter CpG island in the Exceptional Responder tumors. Tumors with a probe success rate lower than 10% were omitted from the analysis (see Table S10). The DNA methylation  $\beta$  values are represented by using a color scale from dark blue (low DNA methylation) to red (high DNA methylation). The red box highlights probe cg12981137, which was selected in a previous TCGA study as the optimal probe for evaluation of *MGMT* epigenetic silencing (See Methods, “Epigenetic silencing in DNA damage repair pathways”). Tumors in each disease group are arranged from top to bottom in order of decreasing DNA methylation level at cg12981137. Patient IDs in the selected disease groups are listed to the right of the heatmap, in which hypermethylated cases are indicated in red.

**(B)** Scatter plots exhibiting an inverse relationship between DNA methylation (cg12981137) and *MGMT* expression [ $\log_2(\text{RSEM}+1)$ ] in TCGA brain tumors. The DNA methylation levels of Exceptional Responder cases are indicated by the red triangles on the horizontal axis. Three Exceptional Responder cases (ER0072, ER0151, and ER0256) are missing DNA methylation data.

Figure S3

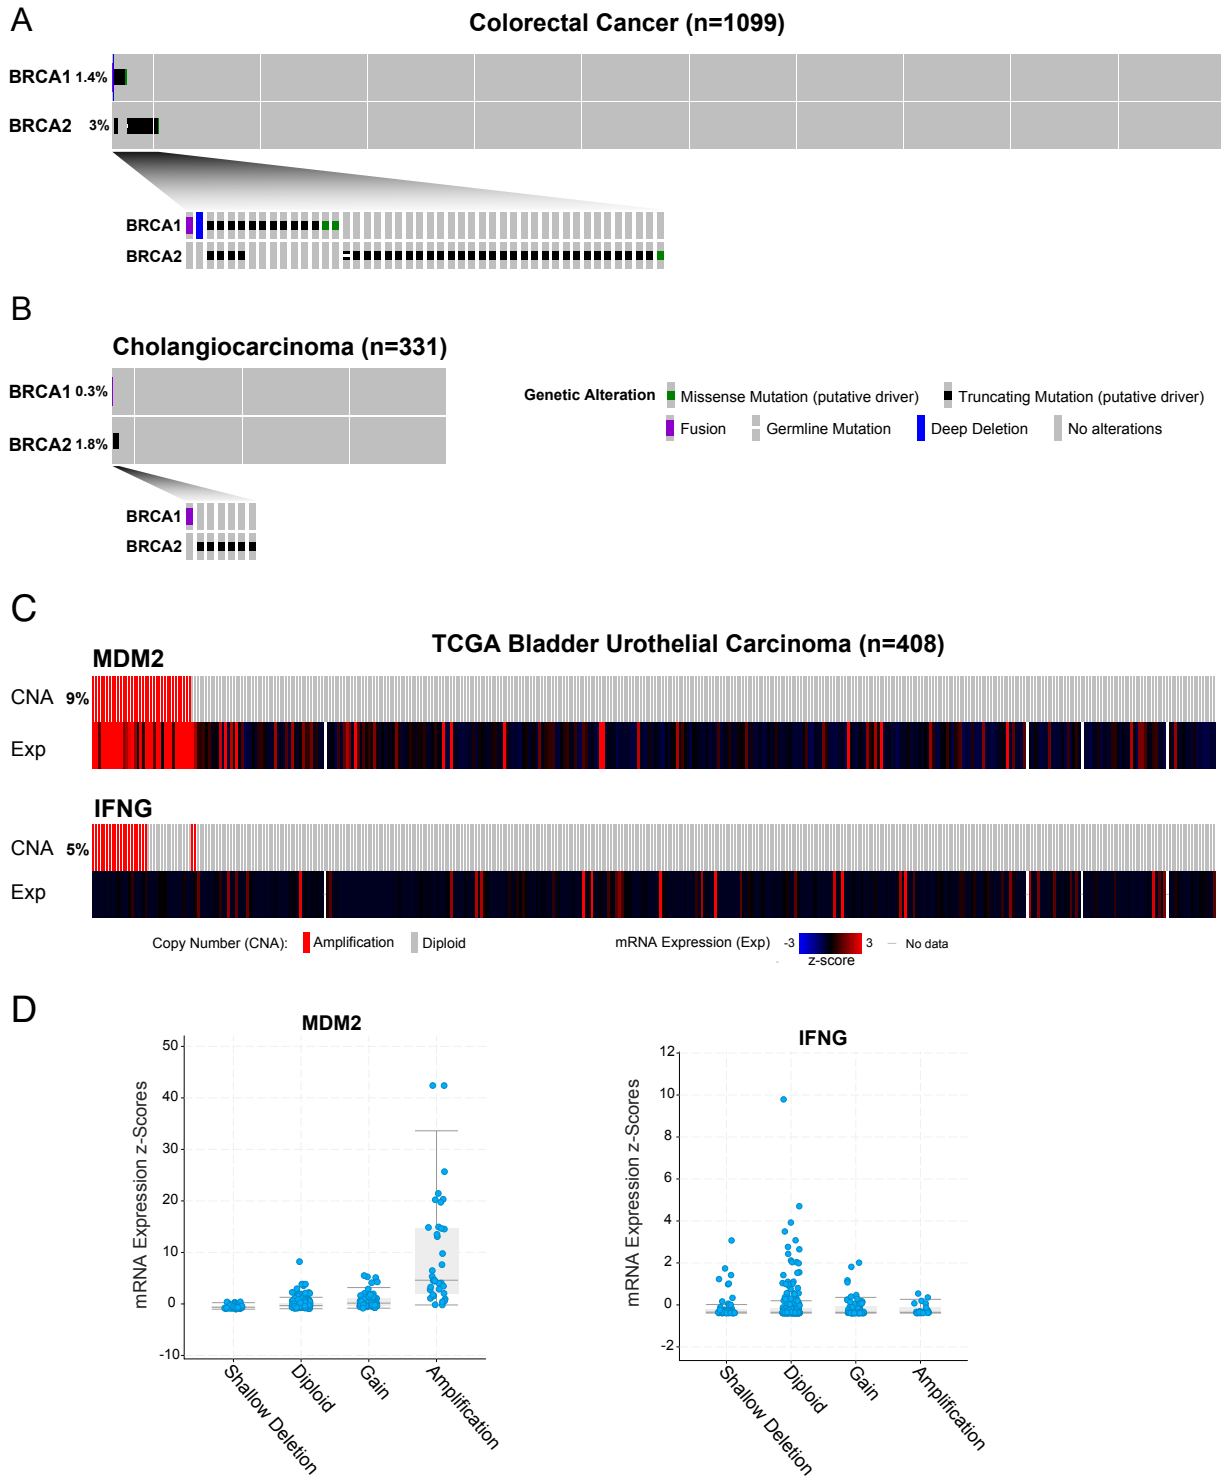

**Figure S3. ER Cases 0075, 0399, 0483. Inactivating mutation in *BRCA1* and *BRCA2* are rare in colorectal cancers and cholangiocarcinomas, Related to Table 1.**

**(A)** Colorectal cancers, data from MSKCC Impact (n = 1099). In MSKCC impact, *BRCA1* had 13 inactivating of 1099 CRC patients (inactivating = homozygous deletion, nonsense, fs, splice site = 10 of 13 are fs. 5/10 are *MLH1* or *MSH2* inactivating mutations (<1% of patients), 1.4% of patients.

**(B)** Cholangiocarcinoma, data from 3 studies, MSKCC Impact, TCGA, and the Shanghai Intrahepatic Cholangiocarcinoma study were pooled for a combined cohort of 334 samples. Data is rendered from cBioPortal.

**Occurrence of *MDM2* and *IFNG* amplification in TCGA bladder cancer, Figures C and D are also related to Figures 4B-F, case 0401.**

**(C)** *MDM2* and *IFNG* are located about 690kb apart on Chr 12q15 and co-amplified in about 5% of bladder cancers from TCGA (copy number alteration [CNA] tracks). *MDM2* is almost always upregulated when amplified, whereas *IFNG* was never upregulated when amplified in this data set (expression [exp] tracks). Nonetheless, in ER0401, *IFNG* was robustly expressed in tumor cells.

**(D)** Overall relationship between gene copy number and gene expression for *MDM2* and *IFNG* in the TCGA bladder cancer cohort, n=404. The box marks the 25th and 75th quartiles and the whiskers are the 1.5 times the inter-quartile range.

Figure S4

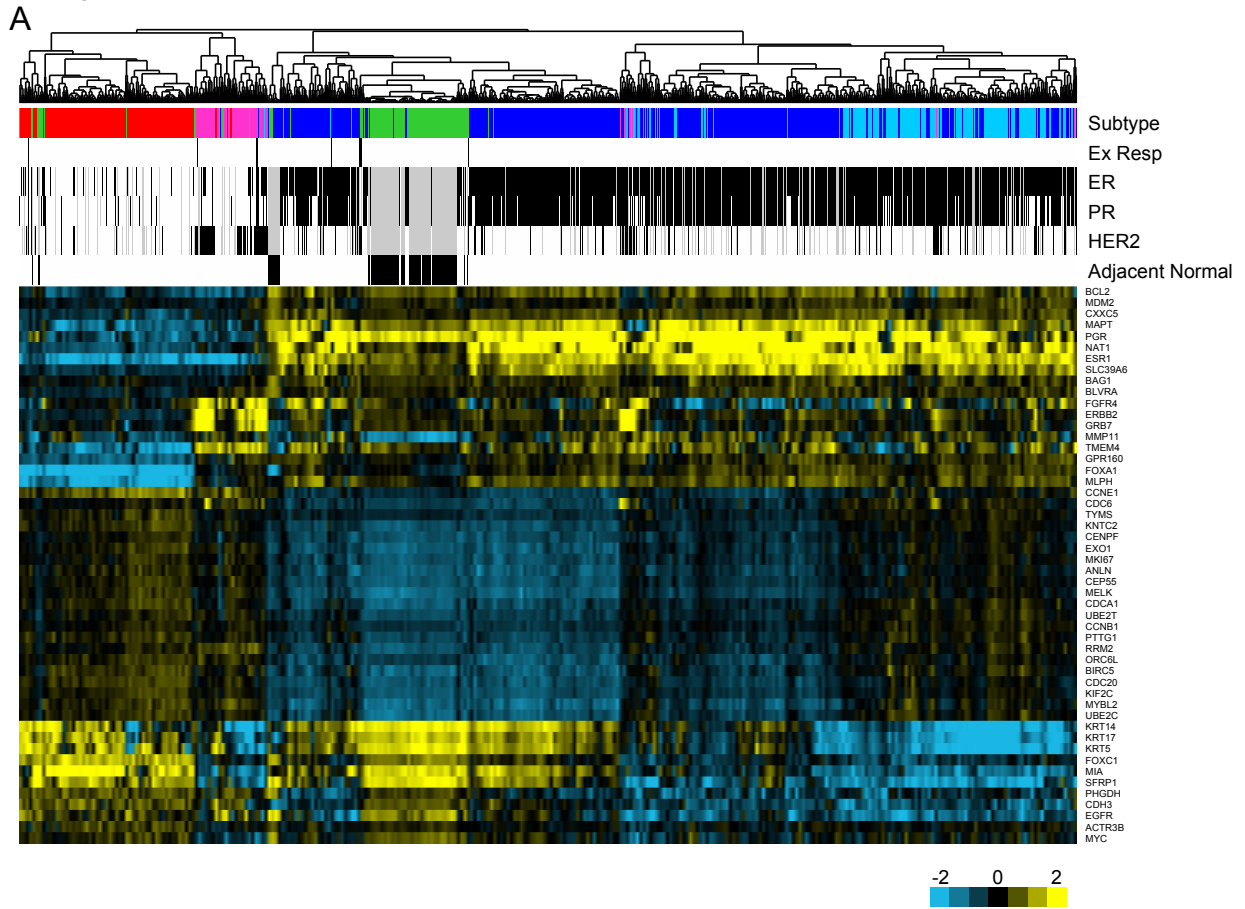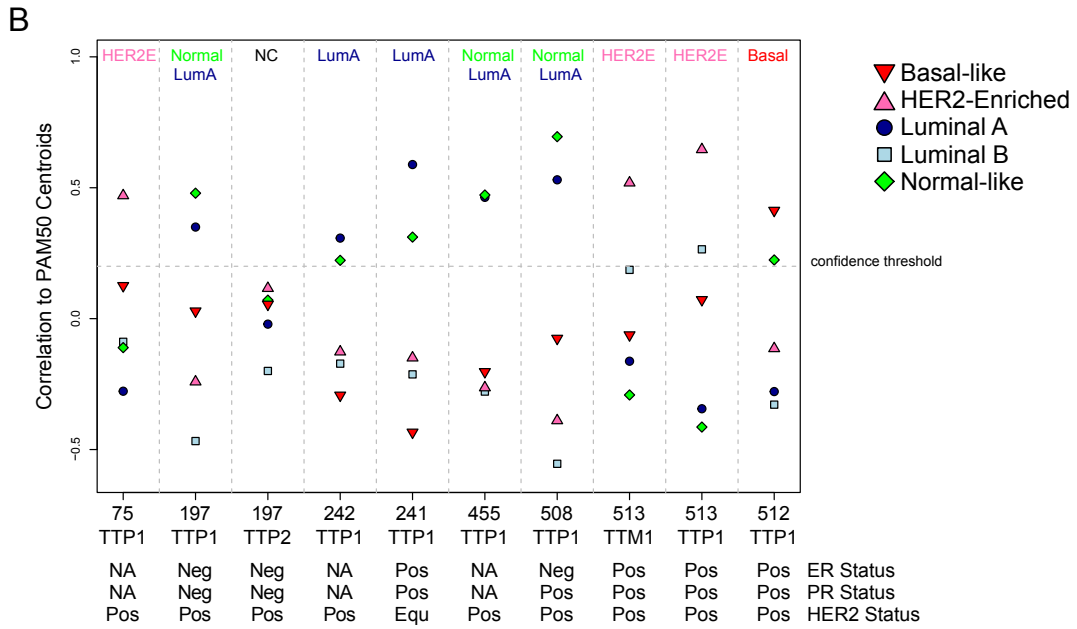



**Figure S4. Breast cancer subtypes among Exceptional Responders, Related to Figures 3A and B.**

(A) Exceptional responder breast cancer samples co-clustered with the TCGA breast cancer and adjacent normal breast samples for the 50 PAM50 genes. Annotation bars above cluster indicate PAM50 subtype, Exceptional Responder Cohort (Ex Resp), Clinical status for ER, PR and HER2, and indicator adjacent normal samples.

(B) The expression profiles of the Exceptional Responder breast cancer cases were fit to the PAM50 classifier based on correlation to centroids of each of 5 subtypes listed in the figure Key at the upper right. Below the plot clinical status for estrogen receptor (ER), progesterone receptor (PR) and Her2 (ERBB2) are given. The final call for the PAM50 subtype, based on this highest correlation, is given at the top of the figure. Note: In this test a normal centroid was included, and 3 of the tumors matched the normal most closely. The commercial Prosigna test does not include a Normal-like centroid. Using the Prosigna criteria the 3 Normal like would match the Luminal A. NC – not well correlated (AC0F, had poorer quality RNA); HER2E -- Her2-enriched.

Figure S5

Matched Tumor Types

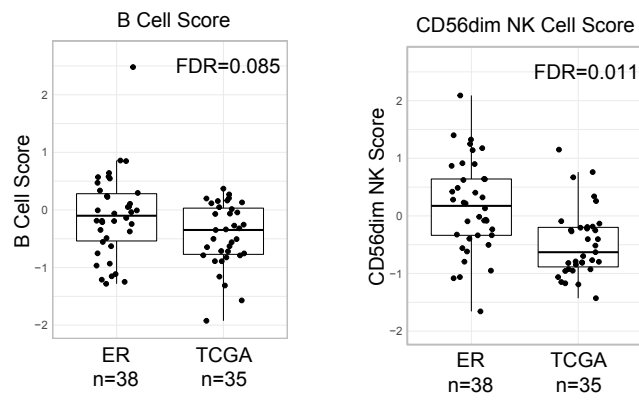

**Figure S5. Comparison of immune signatures for B-cell and CD56dim NK cells.**

**Related to Figure 4A** Exceptional Responders (ER) and TCGA FFPE samples compared among the same 6 tumor types shared by both cohorts. “n”, is the number of tumors tested. Expression levels were based on NanoString IO360 array with modifications (see also Star Methods, and Tables S3A, B).

Figure S6

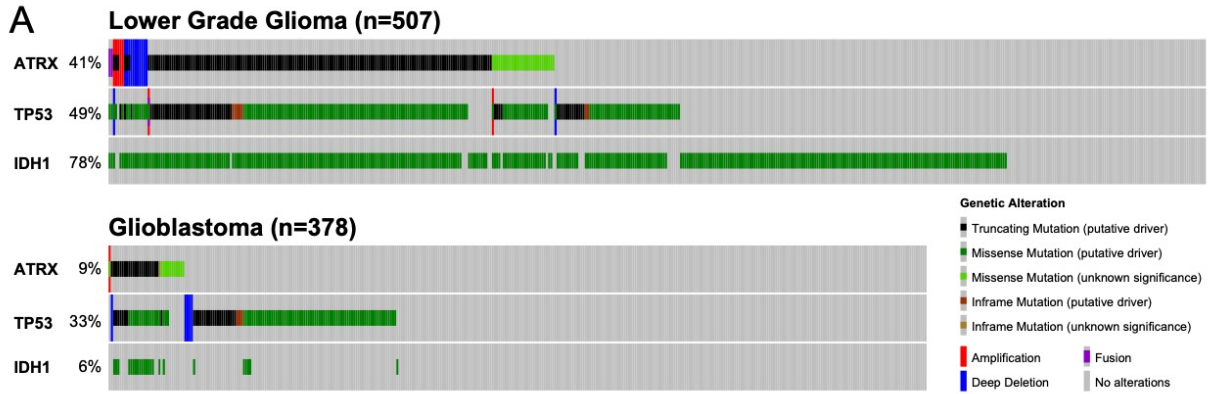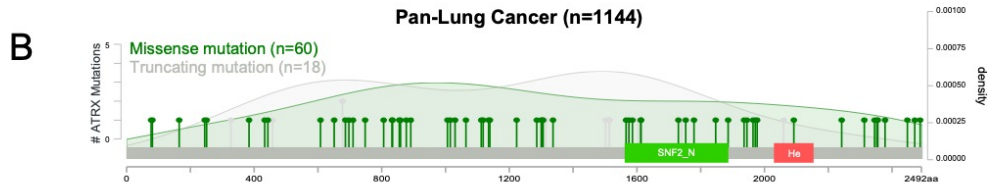

**Figure S6. Co-occurrence of ATRX, TP53, IDH1 in LGG and GBM; Related to Figure 5 and Table S5.**

**(A)** Mutation occurrence plot showing the TCGA mutation frequencies for the 3 genes is significantly different between low- and high-grade glioma: ATRX, TP53 and IDH1 are all commonly mutated in low grade glioma, and much less frequent in primary GBM in the TCGA data.

**(B)** ATRX mutations in lung adenocarcinoma (TCGA Pan Lung Cancer) where the gene plays a much smaller role and inactivating mutations are rare compared to missense mutations. Note that in spite of many more missense mutations in this cancer, there is no clustering of missense mutations in the SNF2\_N or Helicase domains as was observed in glioma. The distribution of missense mutations mirrors the distribution of truncating mutations.

**Table S3. Comparison of immune expression signatures between ER and TCGA samples, Related to Figures 4, S5 and STAR Methods, "Evaluation of Immune Cell Markers."**

| Signature <sup>a</sup> | ER vs TCGA Comparison <sup>b</sup> | MEAN ER <sup>c</sup> | SD ER <sup>d</sup> | MEAN TCGA <sup>e</sup> | SD TCGA <sup>f</sup> | p Ttest <sup>g</sup> | p Ttest FDR <sup>h</sup> | p LR Group adj <sup>i</sup> | p LR Group adj FDR <sup>i</sup> |
|------------------------|------------------------------------|----------------------|--------------------|------------------------|----------------------|----------------------|--------------------------|-----------------------------|---------------------------------|
| B Cell                 | All                                | 0.0493               | 0.6617             | -0.4348                | 0.5481               | 0.0002               | 0.0016                   | n/a                         | n/a                             |
| NKCD56dim              | All                                | 0.1628               | 0.7042             | -0.4762                | 0.5893               | 0                    | 0.0001                   | n/a                         | n/a                             |
| CD45                   | All                                | -0.0537              | 1.0043             | -0.0701                | 0.8904               | 0.9325               | 0.9325                   | n/a                         | n/a                             |
| CD8 T Cell             | All                                | 0.0242               | 0.6174             | -0.2166                | 0.7439               | 0.0657               | 0.1805                   | n/a                         | n/a                             |
| Cytotoxic Cell         | All                                | -0.025               | 0.5715             | -0.0069                | 0.6702               | 0.8791               | 0.9325                   | n/a                         | n/a                             |
| Dendritic Cell         | All                                | 0.0176               | 0.5092             | -0.0713                | 0.8108               | 0.4602               | 0.6372                   | n/a                         | n/a                             |
| Exhausted CD8          | All                                | -0.0784              | 0.6114             | -0.1459                | 0.7444               | 0.6014               | 0.7732                   | n/a                         | n/a                             |
| Macrophage             | All                                | -0.0513              | 0.5498             | 0.1127                 | 0.6187               | 0.1488               | 0.2976                   | n/a                         | n/a                             |
| Mast Cell              | All                                | -0.0637              | 0.7752             | -0.0879                | 0.9114               | 0.8812               | 0.9325                   | n/a                         | n/a                             |
| Neutrophil             | All                                | 0.0612               | 0.5257             | -0.3025                | 0.5935               | 0.001                | 0.0061                   | n/a                         | n/a                             |
| Nk Cell                | All                                | 0.0671               | 0.8084             | -0.2025                | 0.7639               | 0.0904               | 0.2034                   | n/a                         | n/a                             |
| T Cell                 | All                                | 0.0056               | 0.6556             | -0.1277                | 0.6944               | 0.315                | 0.5154                   | n/a                         | n/a                             |
| T helper               | All                                | -0.0984              | 0.7707             | 0.1735                 | 0.6174               | 0.0636               | 0.1805                   | n/a                         | n/a                             |
| T fh                   | All                                | 0.0157               | 0.707              | -0.1034                | 0.6161               | 0.3817               | 0.5726                   | n/a                         | n/a                             |
| Th1                    | All                                | 0.1027               | 0.9971             | -0.3539                | 0.9742               | 0.0217               | 0.0978                   | n/a                         | n/a                             |
| T reg                  | All                                | -0.019               | 0.6411             | 0.1278                 | 0.6225               | 0.2467               | 0.4441                   | n/a                         | n/a                             |
| IFNG                   | All                                | -0.0388              | 0.992              | 0.0511                 | 1.0992               | 0.6582               | 0.7899                   | n/a                         | n/a                             |
| TNF                    | All                                | 0.1047               | 0.8996             | -0.2495                | 1.1643               | 0.0702               | 0.1805                   | n/a                         | n/a                             |
| B Cell                 | Match Histo                        | -0.1058              | 0.7378             | -0.4348                | 0.5481               | 0.0352               | 0.3166                   | 0.0095                      | 0.0858                          |
| NKCD56dim              | Match Histo                        | 0.1648               | 0.8035             | -0.4762                | 0.5893               | 0.0002               | 0.0045                   | 0.0007                      | 0.0118                          |
| CD45                   | Match Histo                        | -0.1922              | 1.0241             | -0.0701                | 0.8904               | 0.5897               | 0.7582                   | 0.858                       | 0.858                           |
| CD8 T Cell             | Match Histo                        | -0.0386              | 0.5922             | -0.2166                | 0.7439               | 0.2601               | 0.6681                   | 0.1322                      | 0.4758                          |
| Cytotoxic Cell         | Match Histo                        | -0.0167              | 0.4746             | -0.0069                | 0.6702               | 0.9421               | 0.9421                   | 0.5103                      | 0.7065                          |
| Dendritic Cell         | Match Histo                        | -0.0023              | 0.4934             | -0.0713                | 0.8108               | 0.6587               | 0.7673                   | 0.3047                      | 0.6255                          |
| Exhausted CD8          | Match Histo                        | -0.1138              | 0.6193             | -0.1459                | 0.7444               | 0.8413               | 0.8908                   | 0.7726                      | 0.858                           |
| Macrophage             | Match Histo                        | -0.0559              | 0.528              | 0.1127                 | 0.6187               | 0.2137               | 0.6681                   | 0.4347                      | 0.652                           |
| Mast Cell              | Match Histo                        | 0.051                | 0.7889             | -0.0879                | 0.9114               | 0.4876               | 0.7308                   | 0.658                       | 0.7896                          |
| Neutrophil             | Match Histo                        | -0.0587              | 0.5192             | -0.3025                | 0.5935               | 0.0654               | 0.3303                   | 0.1087                      | 0.4758                          |
| Nk Cell                | Match Histo                        | -0.0861              | 0.7993             | -0.2025                | 0.7639               | 0.5278               | 0.7308                   | 0.3299                      | 0.6255                          |
| T Cells                | Match Histo                        | 0.0327               | 0.63               | -0.1277                | 0.6944               | 0.3043               | 0.6681                   | 0.0796                      | 0.4758                          |
| T helper               | Match Histo                        | -0.087               | 0.6065             | 0.1735                 | 0.6174               | 0.0734               | 0.3303                   | 0.2613                      | 0.6255                          |
| T fh                   | Match Histo                        | 0.0469               | 0.6972             | -0.1034                | 0.6161               | 0.3341               | 0.6681                   | 0.1792                      | 0.5377                          |
| Th1                    | Match Histo                        | -0.2541              | 1.0892             | -0.3539                | 0.9742               | 0.682                | 0.7673                   | 0.8392                      | 0.858                           |
| T reg                  | Match Histo                        | 0.0402               | 0.556              | 0.1278                 | 0.6225               | 0.527                | 0.7308                   | 0.6201                      | 0.7896                          |
| IFNG                   | Match Histo                        | -0.2017              | 0.9037             | 0.0511                 | 1.0992               | 0.2852               | 0.6681                   | 0.3822                      | 0.6255                          |
| TNF                    | Match Histo                        | -0.0403              | 0.8339             | -0.2495                | 1.1643               | 0.3776               | 0.6797                   | 0.3634                      | 0.6255                          |

a, Cell-type signatures from Nanostring IO360

b, Cell-type signatures were compared in two ways: All ER vs All TCGA available; and by using identical histologies

c, Mean of scores for the ER cases

d, Standard deviation of scores for the ER cases

e, Mean of scores for the TCGA cases

f, Standard deviation of scores for the TCGA cases

g, P-value for standard t-test (assuming equal variance) comparing mean score in ER cases to that in TCGA cases

h, Benjamin- Hochberg FDR-adjusted p-value computed from the 18 unadjusted p-values in column F (p Ttest )

i, P-value for a likelihood ratio (LR) test comparing mean score in ER cases to that in TCGA cases *after* adjusting for tumor type. The LR test tends to be slightly more powerful than the standard ANOVA

j, Benjamin- Hochberg FDR-adjusted p-value computed from the 18 unadjusted p-values in column H (p LR Group adj)

**Table S5. Exceptional Responder Brain Cancers, Related to Figure 5 and Figure S6A,B.**

| Disease                       | Case ID | Age Gender | Treatment                         | 1p/19q loss | IDH1  | Tel maint <sup>a</sup> | TP53 | MGMT  | DNA Damage Response <sup>b</sup> | L1 Category | Comments                                                     |
|-------------------------------|---------|------------|-----------------------------------|-------------|-------|------------------------|------|-------|----------------------------------|-------------|--------------------------------------------------------------|
| GBM                           | 366     | 48 F       | RT, Gliadel wafer, TMZ            | N           | -     | TERT <sup>p</sup>      | -    | dn me | APEX1, <sup>c</sup> EXO5 me      | DDR         | High proliferation score                                     |
| GBM                           | 431     | 51 M       | TMZ                               | N           | -     | TERT <sup>p</sup>      | -    | dn    | -                                | -           | Lowest MGMT among GBM, high IFNG                             |
| GBM                           | 484     | 73 M       | RT, TMZ                           | N           | -     | TERT <sup>p</sup>      | mut  |       | -                                | -           | Highest proliferation score among GBM                        |
| GBM                           | 187     | 26 F       | Cediranib<br>Cilengitide          | N           | R132H | -                      | mut  |       | -                                | PG          |                                                              |
| GBM                           | 394     | 27 F       | TMZ, RT                           | N           | R132H | ATRX pM1839K           | mut  | me    | DDB2 me                          | PG          | ATRX VUS in SNF2 domain                                      |
| GBM                           | 486     | 35 M       | RT TMZ,<br>Irinotecan             | N           | R132C | ATRX fs                | mut  | dn me | DDB2 me<br>POLE4 me,<br>XRCC4 fs | PG          |                                                              |
| Astrocytoma (G3)              | 151     | 45 F       | Irinotecan<br>Bevacusumab         | N           | R132H | ATRX fs                | mut  |       | -                                | PG          |                                                              |
| Astrocytoma (anaplastic G3/4) | 305     | 28 F       | Carbozantinib                     | N           | R132L | ATRX p.I2050N          | mut  |       | MLH3 me,<br>DDB2 me              | PG          | High mutation burden 7.9/Mb, ATRX (VUS) in helicase domain   |
| Astrocytoma (G3/4)            | 256     | 25 F       | TMZ,<br>Irinotecan<br>Bevacizumab | N           | -     | -                      | mut  |       | POLE V411L                       | PG          | MSI and POLE exonuclease domain mutant tumor likely indolent |
| Low Grade Glioma              | 72      | 40 M       | Irinotecan                        | Y           | R132H | -                      | -    |       | POLQ ns                          | PG          | High mutation burden. REV1 R167S (VUS)                       |

Abbreviations: DDR, DNA Damage Response; dn reg, down-regulation of mRNA expression; fs, frame shift; me, promoter methylation; ns, nonsense mutation; ss, splice site mutation; VUS, variant of unknown significance. See footnotes to Table 1 for drug definitions.

a, TERT<sup>p</sup>, promoter region mutations upregulating TERT. Inactivation of ATRX promotes activation of the ALT telomere maintenance pathway.

b, Inactivation of known DNA damage response genes by mutation or DNA methylation.

c, APEX1 is the 3' partner of a translocation with ACTN4. APEX1 transcriptionally silenced (see Figure 1.)

**Table S9. Probe success rates for Exceptional Responder cases with methylation data. Related to Star Methods, “DNA Methylation, Data production.”**

| <b>ER Case ID</b> | <b>Sample ID</b>             | <b>IDAT barcode</b> | <b>Probe success rate</b> |
|-------------------|------------------------------|---------------------|---------------------------|
| 012               | ER-ABCU-TTM1-A-1-0-D-A508-38 | 200512330144_R01C01 | 0.104                     |
| 012               | ER-ABCU-TTP1-A-1-0-D-A508-38 | 200512330144_R02C01 | 0.199                     |
| 018               | ER-ABDN-TTP1-A-2-0-D-A508-38 | 200512330144_R03C01 | 0.577                     |
| 073               | ER-ABDV-NT1-A-2-0-D-A508-38  | 200512330144_R04C01 | 0.521                     |
| 073               | ER-ABDV-TTP1-A-1-0-D-A508-38 | 200512330144_R05C01 | 0.559                     |
| 064               | ER-ABDX-NT1-A-1-0-D-A508-38  | 200512330144_R06C01 | 0.085                     |
| 064               | ER-ABDX-TTP1-A-2-0-D-A508-38 | 200512330144_R07C01 | 0.162                     |
| 099               | ER-ABEA-TTM1-A-1-0-D-A508-38 | 200512330144_R08C01 | 0.065                     |
| 095               | ER-ABEN-TTP1-A-1-0-D-A76T-38 | 202915460135_R06C01 | 0.936                     |
| 060               | ER-ABEO-TTM1-A-1-0-D-A508-38 | 200514030011_R01C01 | 0.066                     |
| 060               | ER-ABEO-TTP1-A-1-0-D-A508-38 | 200514030011_R02C01 | 0.057                     |
| 075               | ER-ABF0-TTP1-A-1-0-D-A508-38 | 200514030011_R03C01 | 0.529                     |
| 075               | ER-ABF0-NB1-A-1-0-D-A76T-38  | 202915600004_R04C01 | 0.984                     |
| 104               | ER-ABMI-NT1-A-1-0-D-A732-38  | 202277800017_R03C01 | 0.786                     |
| 104               | ER-ABMI-TTP1-A-1-0-D-A76T-38 | 202915460135_R05C01 | 0.799                     |
| 131               | ER-ABNX-TTP1-A-1-0-D-A508-38 | 200514030011_R04C01 | 0.395                     |
| 009               | ER-ABO1-NT1-A-1-0-D-A508-38  | 200514030011_R05C01 | 0.625                     |
| 009               | ER-ABO1-TTP1-A-1-0-D-A508-38 | 200514030011_R06C01 | 0.641                     |
| 100               | ER-ABO4-NT1-A-1-0-D-A508-38  | 200514030011_R07C01 | 0.464                     |
| 100               | ER-ABO4-TTP1-B-1-0-D-A508-38 | 200514030011_R08C01 | 0.098                     |
| 190               | ER-ABOM-TTP1-A-1-0-D-A508-38 | 200514030133_R01C01 | 0.233                     |
| 176               | ER-ABON-TTM1-A-1-0-D-A508-38 | 200514030133_R02C01 | 0.058                     |
| 176               | ER-ABON-TTP1-A-1-0-D-A508-38 | 200514030133_R03C01 | 0.429                     |
| 137               | ER-ABOT-TTM1-A-1-0-D-A508-38 | 200514030133_R04C01 | 0.394                     |
| 120               | ER-ABOU-NT1-A-2-0-D-A508-38  | 200514030133_R05C01 | 0.119                     |
| 120               | ER-ABOU-TTP1-A-1-0-D-A508-38 | 200514030133_R06C01 | 0.155                     |
| 122               | ER-ABPA-TTP1-A-2-0-D-A508-38 | 200514030133_R07C01 | 0.067                     |
| 010               | ER-ABS8-TTP1-A-1-0-D-A508-38 | 200514030133_R08C01 | 0.086                     |
| 117               | ER-ABSE-TTM1-A-1-0-D-A508-38 | 200514030157_R01C01 | 0.393                     |
| 118               | ER-ABSF-TTM1-A-1-0-D-A508-38 | 200514030157_R02C01 | 0.558                     |
| 143               | ER-ABU7-TMM1-A-1-0-D-A508-38 | 200514030157_R03C01 | 0.610                     |
| 132               | ER-ABV2-TTM1-A-1-0-D-A508-38 | 200514030157_R04C01 | 0.223                     |
| 211               | ER-ABV6-TTP1-A-1-0-D-A508-38 | 200514030157_R05C01 | 0.706                     |
| 108               | ER-ABWP-TTM1-A-1-0-D-A508-38 | 200514030157_R06C01 | 0.409                     |



|     |                              |                     |       |
|-----|------------------------------|---------------------|-------|
| 108 | ER-ABWP-NB1-A-1-0-D-A76T-38  | 202915600004_R03C01 | 0.986 |
| 192 | ER-ABXO-TTM1-A-1-0-D-A508-38 | 200514030157_R07C01 | 0.059 |
| 151 | ER-ABXP-TTP1-A-1-0-D-A508-38 | 200514030157_R08C01 | 0.055 |
| 150 | ER-ABXQ-TTP1-A-1-0-D-A508-38 | 200516380104_R01C01 | 0.167 |
| 197 | ER-AC0F-TTP2-A-1-0-D-A732-38 | 202176290117_R08C01 | 0.904 |
| 072 | ER-AC3K-TTP1-A-1-0-D-A508-38 | 200516380104_R02C01 | 0.057 |
| 222 | ER-AC3P-TTP1-A-1-0-D-A508-38 | 200516380104_R03C01 | 0.054 |
| 078 | ER-AC6N-TTM1-A-1-0-D-A76T-38 | 202915600004_R02C01 | 0.888 |
| 242 | ER-AC81-TTP1-A-1-0-D-A508-38 | 200516380104_R05C01 | 0.446 |
| 274 | ER-ACFR-NT1-A-1-0-D-A508-38  | 200512330133_R06C01 | 0.790 |
| 274 | ER-ACFR-TTP1-A-1-0-D-A508-38 | 200516380104_R07C01 | 0.367 |
| 226 | ER-ACGR-TTM1-A-1-0-D-A508-38 | 200512330133_R01C01 | 0.745 |
| 226 | ER-ACGR-NB1-A-1-0-D-A508-38  | 200516380104_R08C01 | 0.421 |
| 248 | ER-ACH5-TTP1-A-8-0-D-A508-38 | 200512330133_R02C01 | 0.600 |
| 305 | ER-ACHG-TTP1-A-1-0-D-A508-38 | 200512330133_R03C01 | 0.844 |
| 343 | ER-AD0G-TTP1-A-1-0-D-A508-38 | 200512330133_R04C01 | 0.940 |
| 161 | ER-AD0W-TTP1-A-1-0-D-A508-38 | 200512330133_R05C01 | 0.830 |
| 291 | ER-AD3L-TTM1-A-1-0-D-A508-38 | 200512330133_R07C01 | 0.848 |
| 148 | ER-AD7D-TTM1-A-1-0-D-A508-38 | 200512330133_R08C01 | 0.723 |
| 148 | ER-AD7D-NT1-A-1-0-D-A732-38  | 202232360155_R02C01 | 0.888 |
| 309 | ER-ADBL-NT1-A-2-0-D-A508-38  | 200512330139_R01C01 | 0.897 |
| 309 | ER-ADBL-TTM1-A-2-0-D-A508-38 | 200512330139_R02C01 | 0.895 |
| 214 | ER-ADBU-TTP1-A-8-0-D-A508-38 | 200512330139_R03C01 | 0.697 |
| 214 | ER-ADBU-TTR1-A-8-0-D-A508-38 | 200512330139_R04C01 | 0.836 |
| 330 | ER-ADC2-TTM1-A-1-0-D-A508-38 | 200512330139_R05C01 | 0.905 |
| 170 | ER-ADIN-NT1-A-1-0-D-A732-38  | 202176290160_R01C01 | 0.872 |
| 170 | ER-ADIN-TTM1-A-1-0-D-A732-38 | 202277800017_R01C01 | 0.853 |
| 324 | ER-ADJ2-TTM1-A-1-0-D-A732-38 | 202410000035_R02C01 | 0.721 |
| 204 | ER-ADRU-NT1-A-1-0-D-A732-38  | 202176290117_R03C01 | 0.913 |
| 204 | ER-ADRU-TTP1-A-1-0-D-A732-38 | 202277800091_R02C01 | 0.773 |
| 384 | ER-ADXD-NT1-A-1-0-D-A732-38  | 202232360155_R05C01 | 0.884 |
| 384 | ER-ADXD-TTP1-A-1-0-D-A732-38 | 202277800091_R06C01 | 0.668 |
| 356 | ER-ADXR-TTP1-A-1-0-D-A732-38 | 202176290160_R03C01 | 0.736 |
| 356 | ER-ADXR-TTM1-A-1-0-D-A732-38 | 202232360108_R07C01 | 0.838 |
| 372 | ER-AE02-TTP1-A-1-0-D-A732-38 | 202277800091_R01C01 | 0.625 |
| 282 | ER-AE2I-TTP1-A-1-0-D-A732-38 | 202232360108_R06C01 | 0.800 |
| 102 | ER-AE67-TTP1-A-1-0-D-A732-38 | 202277800091_R07C01 | 0.862 |
| 421 | ER-AE6D-TTP1-A-1-0-D-A732-38 | 202277800091_R05C01 | 0.819 |
| 390 | ER-AE7D-NT1-A-2-0-D-A732-38  | 202176290160_R05C01 | 0.709 |
| 390 | ER-AE7D-TTM1-A-1-0-D-A732-38 | 202232360108_R02C01 | 0.643 |

|     |                              |                     |       |
|-----|------------------------------|---------------------|-------|
| 059 | ER-AE8Q-TTP1-A-1-0-D-A732-38 | 202232360155_R01C01 | 0.853 |
| 024 | ER-AE8R-TTM1-A-1-0-D-A732-38 | 202176290117_R04C01 | 0.906 |
| 024 | ER-AE8R-TTP1-A-1-0-D-A732-38 | 202232360155_R06C01 | 0.837 |
| 062 | ER-AE8U-TTM1-A-1-0-D-A732-38 | 202232360155_R07C01 | 0.883 |
| 413 | ER-AE91-TTP1-A-1-0-D-A732-38 | 202232360155_R03C01 | 0.874 |
| 322 | ER-AEK6-TTM1-A-2-0-D-A732-38 | 202277800017_R02C01 | 0.790 |
| 349 | ER-AEND-TTP1-A-1-0-D-A732-38 | 202176290160_R06C01 | 0.799 |
| 454 | ER-AF1I-TTP1-A-1-0-D-A76T-38 | 202915460135_R08C01 | 0.739 |
| 454 | ER-AF1I-NT1-A-1-0-D-A76T-38  | 202915590155_R01C01 | 0.804 |
| 457 | ER-AFAH-TTP1-A-1-0-D-A732-38 | 202277800091_R03C01 | 0.656 |
| 376 | ER-B0AT-TTP1-A-1-0-D-A732-38 | 202277800091_R04C01 | 0.802 |
| 399 | ER-B0BO-TTM1-A-2-0-D-A732-38 | 202277800017_R08C01 | 0.765 |
| 428 | ER-B0BP-TTM1-A-1-0-D-A732-38 | 202277800017_R06C01 | 0.899 |
| 441 | ER-B0BV-TTM1-A-1-0-D-A732-38 | 202176290160_R08C01 | 0.779 |
| 441 | ER-B0BV-NT1-A-1-0-D-A732-38  | 202277800017_R07C01 | 0.784 |
| 441 | ER-B0BV-NB1-A-1-0-D-A76T-38  | 202915590155_R02C01 | 0.978 |
| 481 | ER-B0C1-TTP1-A-1-0-D-A732-38 | 202232360108_R03C01 | 0.683 |
| 187 | ER-B0C2-TTR1-A-1-0-D-A732-38 | 202277800017_R05C01 | 0.907 |
| 496 | ER-B0C3-NB1-A-1-0-D-A76T-38  | 202915590155_R03C01 | 0.982 |
| 404 | ER-B0CR-NT1-A-1-0-D-A732-38  | 202176290117_R05C01 | 0.909 |
| 404 | ER-B0CR-TTP1-A-1-0-D-A732-38 | 202232360108_R01C01 | 0.819 |
| 366 | ER-B0DO-TTP1-A-1-0-D-A732-38 | 202277800091_R08C01 | 0.743 |
| 223 | ER-B0EH-TTM1-A-1-0-D-A76T-38 | 202915460135_R04C01 | 0.924 |
| 483 | ER-B0FX-TTP1-A-9-0-D-A732-38 | 202410000035_R03C01 | 0.639 |
| 498 | ER-B0FY-TTM1-A-1-0-D-A732-38 | 202410000035_R01C01 | 0.776 |
| 395 | ER-B0GE-TTP1-A-1-0-D-A732-38 | 202176290117_R01C01 | 0.885 |
| 396 | ER-B0GF-TTM1-A-1-0-D-A732-38 | 202277800017_R04C01 | 0.822 |
| 431 | ER-B0GH-TTP1-A-1-0-D-A732-38 | 202232360108_R08C01 | 0.813 |
| 425 | ER-B0GI-TTP1-A-1-0-D-A732-38 | 202232360155_R08C01 | 0.873 |
| 385 | ER-B0GM-TTM1-A-1-0-D-A732-38 | 202176290117_R07C01 | 0.927 |
| 455 | ER-B0GQ-TTP1-A-1-0-D-A76T-38 | 202915460135_R07C01 | 0.894 |
| 392 | ER-B0HF-TTP1-A-1-0-D-A732-38 | 202176290160_R04C01 | 0.827 |
| 392 | ER-B0HF-TTM1-A-1-0-D-A732-38 | 202232360108_R05C01 | 0.810 |
| 401 | ER-B1HQ-TTP1-A-1-0-D-A76T-38 | 202915590155_R07C01 | 0.908 |
| 394 | ER-B1HR-TTP1-A-1-0-D-A732-38 | 202232360155_R04C01 | 0.817 |
| 402 | ER-B1HS-TTP1-A-1-0-D-A732-38 | 202232360108_R04C01 | 0.892 |
| 486 | ER-B1I4-TTP1-A-1-0-D-A732-38 | 202176290117_R02C01 | 0.912 |
| 466 | ER-B1I5-TTM1-A-1-0-D-A732-38 | 202176290160_R02C01 | 0.763 |
| 474 | ER-B1I8-TTP2-A-1-0-D-A732-38 | 202176290160_R07C01 | 0.782 |
| 500 | ER-B1IK-TTM1-A-6-0-D-A732-38 | 202176290117_R06C01 | 0.946 |

|     |                               |                     |       |
|-----|-------------------------------|---------------------|-------|
| 521 | ER-B1MD-TTP1-A-14-0-D-A76T-38 | 202915590155_R06C01 | 0.763 |
| 515 | ER-B1ME-TTM1-A-1-0-D-A76T-38  | 202915590155_R05C01 | 0.898 |
| 520 | ER-B1MF-TTR1-A-11-0-D-A76T-38 | 202915600004_R01C01 | 0.716 |
| 484 | ER-B1MG-TTP1-A-1-0-D-A76T-38  | 202915590155_R04C01 | 0.827 |
| 513 | ER-B1PV-TTM1-A-10-0-D-A76T-38 | 202915590155_R08C01 | 0.812 |

---

**Table S10. DNA methylation probe success rates for Exceptional Responder cases, Related to Figure S2 and STAR Methods.**

| <b>Case Number</b> | <b>Tumor tissue</b> | <b>Heatmap sample order</b> | <b>Disease group</b>            | <b>MGMT DNA methylation at cg12981137</b> |
|--------------------|---------------------|-----------------------------|---------------------------------|-------------------------------------------|
| 366                | Primary             | 1                           | GBM                             | 0.7712                                    |
| 305                | Primary             | 2                           | GBM                             | 0.5237                                    |
| 394                | Primary             | 3                           | GBM                             | 0.5199                                    |
| 484                | Primary             | 4                           | GBM                             | 0.4953                                    |
| 486                | Primary             | 5                           | GBM                             | 0.4534                                    |
| 431                | Primary             | 6                           | GBM                             | 0.2526                                    |
| 498                | Metastatic          | 7                           | Colorectal adenocarcinoma       | 0.3879                                    |
| 248                | Primary             | 8                           | Colorectal adenocarcinoma       | 0.3481                                    |
| 474                | Primary             | 9                           | Colorectal adenocarcinoma       | 0.3367                                    |
| 457                | Primary             | 10                          | Colorectal adenocarcinoma       | 0.2800                                    |
| 404                | Primary             | 11                          | Colorectal adenocarcinoma       | 0.2292                                    |
| 095                | Primary             | 12                          | Colorectal adenocarcinoma       | 0.1180                                    |
| 500                | Metastatic          | 13                          | Colorectal adenocarcinoma       | 0.0997                                    |
| 343                | Primary             | 14                          | Colorectal adenocarcinoma       | 0.0587                                    |
| 483                | Primary             | 15                          | Colorectal adenocarcinoma       | 0.0567                                    |
| 384                | Primary             | 16                          | Colorectal adenocarcinoma       | 0.0446                                    |
| 148                | Metastatic          | 17                          | Colorectal adenocarcinoma       | 0.0376                                    |
| 104                | Primary             | 18                          | Colorectal adenocarcinoma       | 0.0355                                    |
| 349                | Primary             | 19                          | Colorectal adenocarcinoma       | 0.0329                                    |
| 395                | Primary             | 20                          | Colorectal adenocarcinoma       | 0.0296                                    |
| 425                | Primary             | 21                          | Colorectal adenocarcinoma       | 0.0290                                    |
| 117                | Metastatic          | 22                          | Colorectal adenocarcinoma       | 0.0149                                    |
| 176                | Primary             | 23                          | Colorectal adenocarcinoma       | 0.0097                                    |
| 073                | Primary             | 24                          | Gastroesophageal adenocarcinoma | 0.5417                                    |
| 413                | Primary             | 25                          | Gastroesophageal adenocarcinoma | 0.4071                                    |
| 392                | Primary             | 26                          | Gastroesophageal adenocarcinoma | 0.3920                                    |
| 392                | Metastatic          | 27                          | Gastroesophageal adenocarcinoma | 0.2527                                    |
| 161                | Primary             | 28                          | Gastroesophageal adenocarcinoma | 0.1616                                    |
| 421                | Primary             | 29                          | Gastroesophageal adenocarcinoma | 0.1371                                    |
| 282                | Primary             | 30                          | Gastroesophageal adenocarcinoma | 0.1197                                    |
| 376                | Primary             | 31                          | Gastroesophageal adenocarcinoma | 0.0523                                    |
| 372                | Primary             | 32                          | Gastroesophageal adenocarcinoma | 0.0424                                    |
| 441                | Metastatic          | 33                          | Gastroesophageal adenocarcinoma | 0.0390                                    |
| 211                | Primary             | 34                          | Gastroesophageal adenocarcinoma | 0.0178                                    |

|     |            |    |                                 |        |
|-----|------------|----|---------------------------------|--------|
| 018 | Primary    | 35 | Gastroesophageal adenocarcinoma | 0.0164 |
| 274 | Primary    | 36 | Gastroesophageal adenocarcinoma | 0.0115 |
| 064 | Primary    | 37 | Other                           | 0.0586 |
| 396 | Metastatic | 38 | Other                           | 0.0548 |
| 481 | Primary    | 39 | Other                           | 0.0547 |
| 399 | Metastatic | 40 | Other                           | 0.0517 |
| 322 | Metastatic | 41 | Other                           | 0.0477 |
| 390 | Metastatic | 42 | Other                           | 0.0472 |
| 204 | Primary    | 43 | Other                           | 0.0439 |
| 170 | Metastatic | 44 | Other                           | 0.0413 |
| 466 | Metastatic | 45 | Other                           | 0.0404 |
| 356 | Primary    | 46 | Other                           | 0.0378 |
| 402 | Primary    | 47 | Other                           | 0.0369 |
| 062 | Metastatic | 48 | Other                           | 0.0364 |
| 059 | Primary    | 49 | Other                           | 0.0349 |
| 078 | Metastatic | 50 | Other                           | 0.0337 |
| 324 | Metastatic | 51 | Other                           | 0.0332 |
| 024 | Primary    | 52 | Other                           | 0.0328 |
| 521 | Primary    | 53 | Other                           | 0.0323 |
| 454 | Primary    | 54 | Other                           | 0.0311 |
| 024 | Metastatic | 55 | Other                           | 0.0308 |
| 520 | Recurrence | 56 | Other                           | 0.0306 |
| 455 | Primary    | 57 | Other                           | 0.0305 |
| 356 | Metastatic | 58 | Other                           | 0.0303 |
| 385 | Metastatic | 59 | Other                           | 0.0303 |
| 428 | Metastatic | 60 | Other                           | 0.0303 |
| 102 | Primary    | 61 | Other                           | 0.0301 |
| 401 | Primary    | 62 | Other                           | 0.0300 |
| 223 | Metastatic | 63 | Other                           | 0.0287 |
| 197 | Primary    | 64 | Other                           | 0.0278 |
| 226 | Metastatic | 65 | Other                           | 0.0253 |
| 515 | Metastatic | 66 | Other                           | 0.0248 |
| 214 | Recurrence | 67 | Other                           | 0.0224 |
| 309 | Metastatic | 68 | Other                           | 0.0215 |
| 132 | Metastatic | 69 | Other                           | 0.0201 |
| 137 | Metastatic | 70 | Other                           | 0.0199 |
| 012 | Primary    | 71 | Other                           | 0.0198 |
| 330 | Metastatic | 72 | Other                           | 0.0194 |
| 291 | Metastatic | 73 | Other                           | 0.0181 |
| 214 | Primary    | 74 | Other                           | 0.0174 |

|     |            |    |       |        |
|-----|------------|----|-------|--------|
| 143 | Metastatic | 75 | Other | 0.0171 |
| 118 | Metastatic | 76 | Other | 0.0158 |
| 513 | Metastatic | 77 | Other | 0.0147 |
| 009 | Primary    | 78 | Other | 0.0130 |
| 075 | Primary    | 79 | Other | 0.0127 |
| 108 | Metastatic | 80 | Other | 0.0118 |
| 242 | Primary    | 81 | Other | 0.0098 |
| 120 | Primary    | 82 | Other | 0.0095 |
| 131 | Primary    | 83 | Other | 0.0084 |
| 150 | Primary    | 84 | Other | 0.0084 |
| 190 | Primary    | 85 | Other | 0.0048 |

---
